# Supplementary material for: An enzyme cascade fluorescence-based assay for the quantification of phenylalanine in serum
Source: Royal Society of Chemistry journal article supplement (doi:10.1039/d1an02038b), 2022-01-01
Supplement: d1an02038b1.pdf [file d1an02038b1.pdf]

## Supplementary Information

### Syntheses route of RF

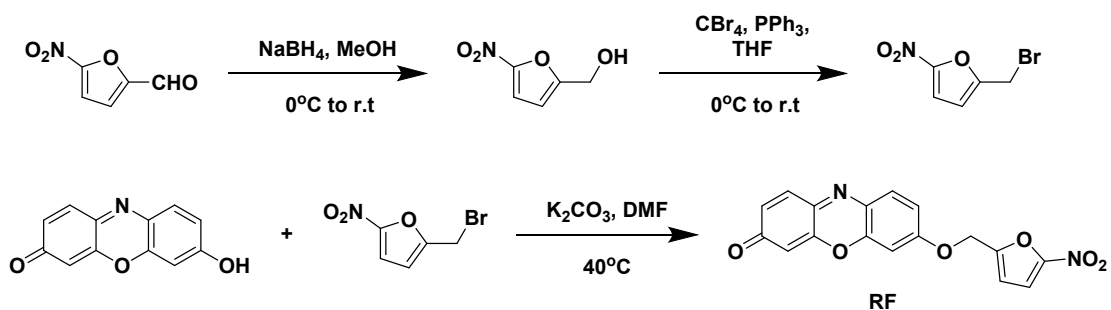

Scheme S1. synthetic procedure of RF.

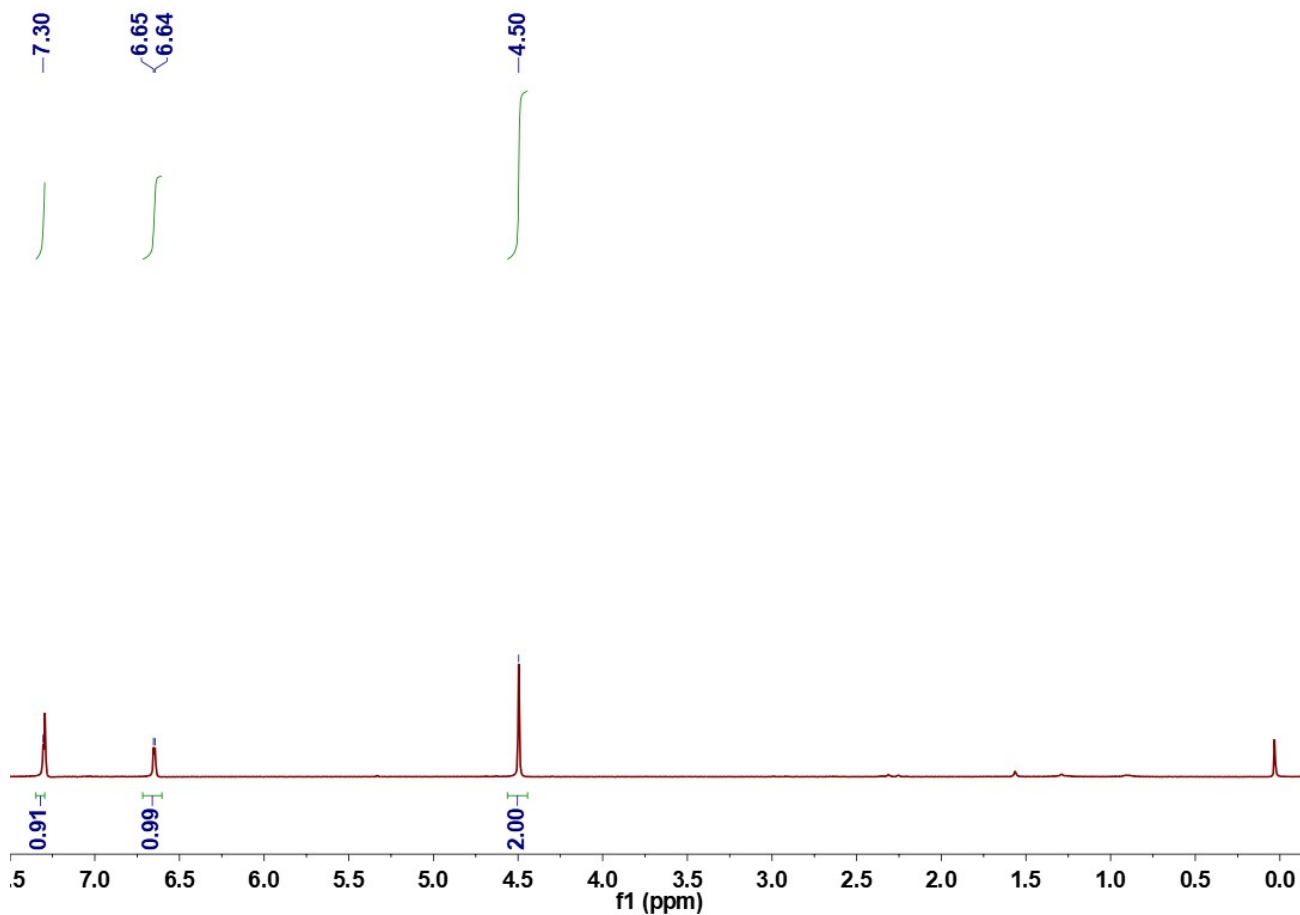

Figure S1.  $^1\text{H}$  NMR spectrum of 5-nitrovanillyl bromide in  $\text{CDCl}_3$ .

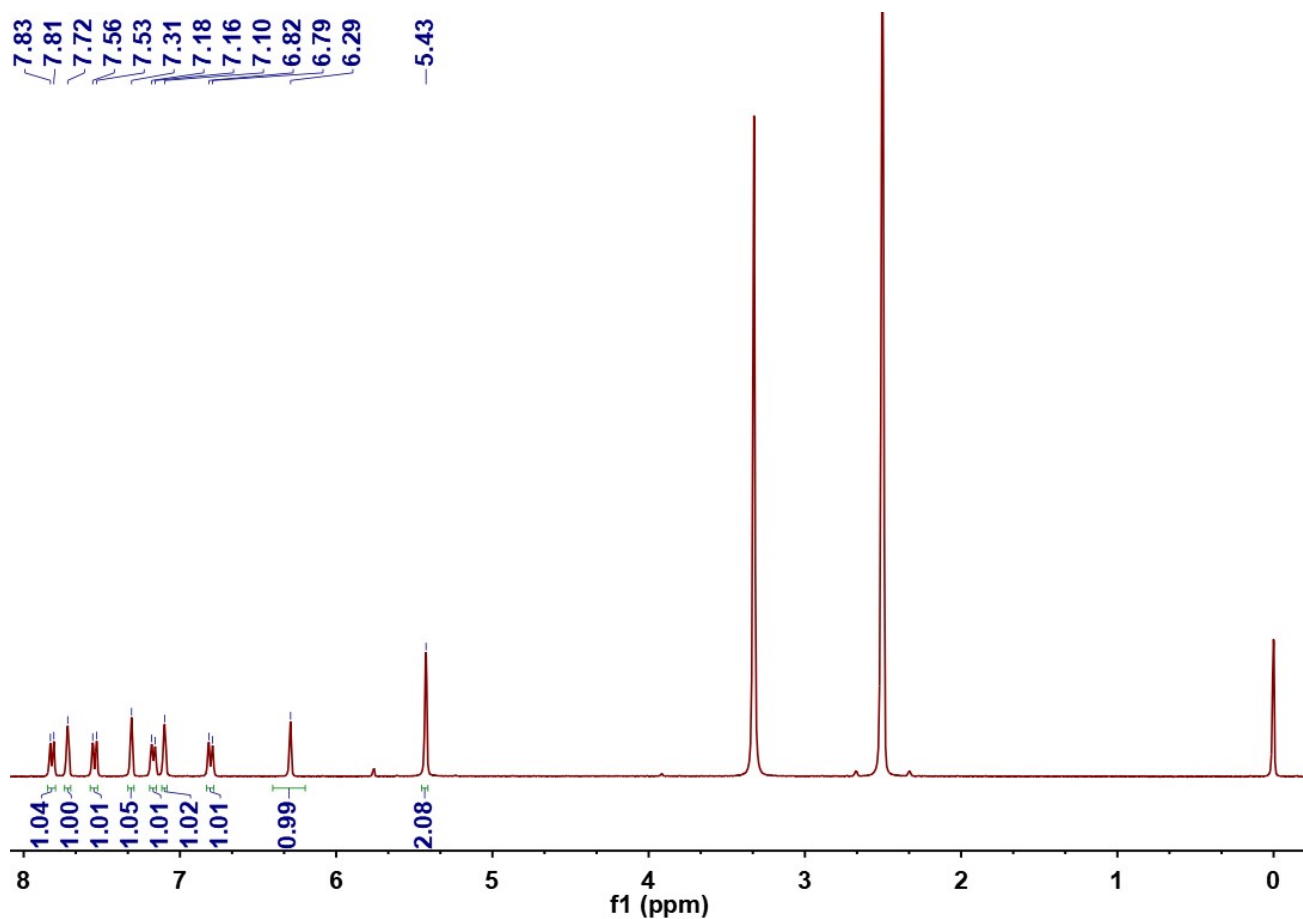

Figure S2.  $^1\text{H}$  NMR spectrum of RF in  $d_6$ -DMSO.

### Response of RF towards NADH

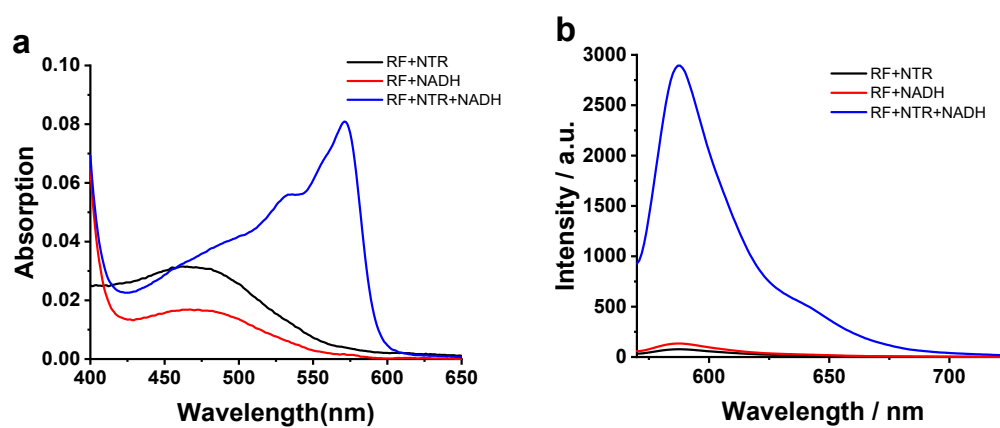

Figure S3. Absorption (a) and fluorescence spectra (b) of RF ( $5\ \mu\text{M}$ ) reacts with nitroreductase (NTR) ( $0.20\ \mu\text{g/mL}$ ) or NADH ( $500\ \mu\text{M}$ ) alone, or both NTR ( $0.20\ \mu\text{g/mL}$ ) and NADH ( $500\ \mu\text{M}$ ) at  $37\ ^\circ\text{C}$  for 15 min.  $\lambda_{\text{ex}} = 540\ \text{nm}$ .

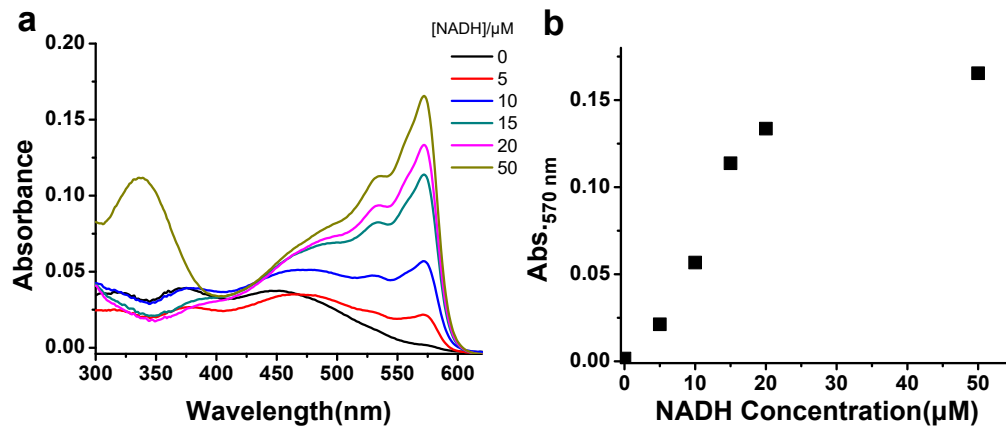

Figure S4. Absorption spectra (a) and corresponding absorbance at 570 nm (b) of probe RF (10 μM) in response to various concentrations of NADH (0 – 50 μM).
